# Supplementary material for: Changes in surface ozone in South Korea on diurnal to decadal time scale for the period of 2001–2021
Source: Copernicus journal article supplement (doi:10.5194/acp-2022-788), 2022-12-12
Supplement: Supplementary file 1 [file KoreaO3_Kimetal_2022_SI2_Station_Info.xlsx]

## Sheet: Site
Index	Station code	City·Province	Site name	Latitude	Longitude	start	end
1	111121	Seoul	Jung-gu	37.5643	126.975	2001-01-01 01:00:00	2021-12-31 23:00:00
2	111123		Jongno-gu	37.572	127.005	2001-01-01 01:00:00	2021-12-31 23:00:00
3	111131		Yongsan-gu	37.54	127.005	2001-01-01 01:00:00	2021-12-31 23:00:00
4	111141		Gwangjin-gu	37.5472	127.092	2001-01-01 01:00:00	2021-12-31 23:00:00
5	111142		Seongdong-gu	37.5432	127.042	2001-01-01 01:00:00	2021-12-31 23:00:00
6	111151		Jungnang-gu	37.5849	127.094	2001-01-01 01:00:00	2021-12-31 23:00:00
7	111152		Dongdaemun-gu	37.5757	127.029	2001-01-01 01:00:00	2021-12-31 23:00:00
8	111161		Seongbuk-gu	37.6067	127.027	2001-01-01 01:00:00	2021-12-31 23:00:00
9	111171		Dobong-gu	37.6542	127.029	2001-01-01 01:00:00	2021-12-31 23:00:00
10	111181		Eunpyeong-gu	37.6098	126.935	2001-01-01 01:00:00	2021-12-31 23:00:00
11	111191		Seodaemun-gu	37.5938	126.95	2001-01-01 01:00:00	2021-12-31 23:00:00
12	111201		Mapo-gu	37.5556	126.906	2001-01-01 01:00:00	2021-12-31 23:00:00
13	111212		Gangseo-gu	37.5447	126.835	2001-01-01 01:00:00	2021-12-31 23:00:00
14	111221		Guro-gu	37.4985	126.89	2001-01-01 01:00:00	2021-12-31 23:00:00
15	111231		Yeongdeungpo-gu	37.525	126.897	2001-01-01 07:00:00	2021-12-31 23:00:00
16	111241		Dongjak-gu	37.4809	126.971	2001-01-01 01:00:00	2021-12-31 23:00:00
17	111251		Gwanak-gu	37.4874	126.927	2001-01-01 01:00:00	2021-12-31 23:00:00
18	111261		Gangnam-gu	37.5176	127.048	2001-01-01 01:00:00	2021-12-31 23:00:00
19	111262		Seocho-gu	37.5046	126.994	2001-01-01 01:00:00	2021-12-31 23:00:00
20	111273		Songpa-gu	37.5027	127.093	2001-01-01 01:00:00	2021-12-31 23:00:00
21	111274		Gangdong-gu	37.545	127.137	2001-01-01 01:00:00	2021-12-31 23:00:00
22	111281		Geumcheon-gu	37.4524	126.908	2001-01-01 01:00:00	2021-12-31 23:00:00
23	111291		Gangbuk-gu	37.6479	127.012	2001-01-01 01:00:00	2021-12-31 23:00:00
24	111301		Yangcheon-gu	37.526	126.857	2001-01-01 01:00:00	2021-12-31 23:00:00
25	111311		Nowon-gu	37.6574	127.068	2001-01-01 01:00:00	2021-12-31 23:00:00
26	831492	Incheon	Baengnyeong island	37.9647	124.634	2012-01-04 11:00:00	2021-12-31 23:00:00
27	823611		Sinheung	37.4684	126.635	2001-01-01 01:00:00	2021-12-31 23:00:00
28	823621		Songnim	37.474	126.644	2001-01-01 01:00:00	2021-12-31 23:00:00
29	823631		Guwol	37.4496	126.724	2001-01-01 01:00:00	2021-12-31 23:00:00
30	823632		Sungui	37.4639	126.65	2001-01-01 01:00:00	2021-12-31 23:00:00
31	823641		Bupyeong	37.5	126.724	2001-01-01 01:00:00	2021-12-31 23:00:00
32	823651		Yeonhui	37.5417	126.681	2001-01-01 01:00:00	2021-12-31 23:00:00
33	823671		Gojan	37.4047	126.697	2001-01-01 01:00:00	2021-12-31 23:00:00
34	823681		Seongnam	37.5027	126.675	2001-01-01 01:00:00	2021-12-31 23:00:00
35	823691		Songhae	37.7645	126.463	2001-01-01 01:00:00	2021-12-31 23:00:00
36	823633		Seokbawi	37.4578	126.691	2001-01-01 01:00:00	2021-12-31 23:00:00
37	525111	Daejeon	Eumnae-dong	36.3728	127.417	2001-01-01 01:00:00	2021-12-31 23:00:00
38	525112		Munpyeong-dong	36.4469	127.405	2002-06-17 17:00:00	2021-12-31 23:00:00
39	525121		Munchang-dong	36.3161	127.438	2001-01-02 15:00:00	2021-12-31 23:00:00
40	525141		Guseong-dong	36.3724	127.374	2001-01-01 01:00:00	2021-12-31 23:00:00
41	525151		Daeheungdong2	36.3239	127.418	2001-01-02 11:00:00	2021-12-31 23:00:00
42	525173		Wolpyeong-dong	36.3511	127.354	2007-10-01 01:00:00	2021-12-31 23:00:00
43	324115	Gwangju	Seoseok-dong	35.1458	126.923	2001-01-01 01:00:00	2021-12-31 23:00:00
44	324121		Nongseong-dong	35.1549	126.888	2001-01-01 01:00:00	2021-12-31 23:00:00
45	324133		Duam-dong	35.1739	126.932	2001-01-01 01:00:00	2021-12-31 23:00:00
46	324141		Songjeong1-dong	35.1407	126.799	2001-01-01 01:00:00	2020-11-12 23:00:00
47	221112	Busan	Gwangbok-dong	35.0999	129.031	2001-01-01 01:00:00	2021-12-31 23:00:00
48	221172		Daeyeon-dong	35.1303	129.088	2001-01-01 01:00:00	2021-12-31 23:00:00
49	221181		Hakjang-dong	35.1461	128.984	2001-01-01 01:00:00	2021-12-31 23:00:00
50	221182		Deokcheon-dong	35.2078	129.006	2001-01-01 01:00:00	2021-12-31 23:00:00
51	221202		Jangnim-dong	35.083	128.967	2001-01-01 01:00:00	2021-12-31 23:00:00
52	221152		Jeonpo-dong	35.156	129.064	2001-01-01 01:00:00	2021-12-31 23:00:00
53	221221		Yeonsan-dong	35.1811	129.075	2001-01-01 01:00:00	2021-12-31 23:00:00
54	221141		Taejongdae	35.0598	129.08	2001-01-01 01:00:00	2021-12-31 23:00:00
55	221191		Cheongnyong-dong	35.2755	129.09	2001-01-01 01:00:00	2021-12-31 23:00:00
56	221192		Jwa-dong	35.1706	129.174	2005-11-14 01:00:00	2021-12-31 23:00:00
57	221211		Daejeo-dong	35.2087	128.973	2002-03-01 01:00:00	2021-12-31 23:00:00
58	221212		Noksan-dong	35.0864	128.863	2004-02-01 01:00:00	2021-12-31 23:00:00
59	221231		Gijang-eup	35.2387	129.216	2002-03-01 01:00:00	2021-12-31 23:00:00
60	221251		Bugok-dong	35.2298	129.093	2002-03-01 01:00:00	2021-12-31 23:00:00
61	221271		Gwangan-dong	35.1575	129.118	2002-04-10 01:00:00	2021-12-31 23:00:00
62	221163		Myeongjang-dong	35.2049	129.104	2003-06-01 01:00:00	2021-12-31 23:00:00
63	221233		Yongsu-ri	35.3256	129.18	2004-10-12 01:00:00	2021-12-31 23:00:00
64	221241		Sujeong-dong	35.1294	129.045	2011-07-21 01:00:00	2021-12-31 23:00:00
65	221281		Daesin-dong	35.1174	129.016	2013-01-01 01:00:00	2021-12-31 23:00:00
66	221282		Deokpo-dong	35.1744	128.985	2018-08-03 01:00:00	2021-12-31 23:00:00
67	221283		Gaegeum-dong	35.1551	129.023	2019-07-01 01:00:00	2021-12-31 23:00:00
68	221284		Dangni-dong	35.1052	128.974	2019-07-01 01:00:00	2021-12-31 23:00:00
69	221193		Jaesong-dong	35.1832	129.121	2020-03-01 01:00:00	2021-12-31 23:00:00
70	221142		Cheonghak-dong	35.0908	129.06	2020-03-01 01:00:00	2021-12-31 23:00:00
71	221183		Hwamyeong-dong	35.2334	129.01	2020-03-01 01:00:00	2021-12-31 23:00:00
72	238120	Ulsan	Daesong-dong	35.5028	129.418	2001-01-01 01:00:00	2021-12-31 23:00:00
73	238121		Seongnam-dong	35.5563	129.32	2001-01-01 01:00:00	2021-12-31 23:00:00
74	238122		Bugok-dong	35.4973	129.339	2001-01-01 01:00:00	2021-12-31 23:00:00
75	238124		Yaeum-dong	35.5261	129.326	2001-01-01 01:00:00	2021-12-31 23:00:00
76	238125		Samsan-dong	35.5444	129.332	2001-05-01 01:00:00	2021-12-31 23:00:00
77	238127		Sinjeong-dong	35.5347	129.308	2001-01-01 01:00:00	2021-12-31 23:00:00
78	238128		Deoksil-ri	35.4348	129.315	2001-01-01 02:00:00	2021-12-31 23:00:00
79	238129		Mugeo-dong	35.5593	129.261	2001-01-01 01:00:00	2021-12-31 23:00:00
80	238130		Hyomun-dong	35.5595	129.371	2006-01-01 01:00:00	2021-12-31 23:00:00
81	238371		Hwasal-ri	35.4381	129.338	2001-01-01 01:00:00	2021-12-31 23:00:00
82	238373		Sangnam-ri	35.4931	129.306	2001-01-01 01:00:00	2021-12-31 23:00:00
83	238126		Sinjeongno	35.5333	129.301	2001-01-01 01:00:00	2021-12-31 23:00:00
84	422114	Daegu	Suchang-dong	35.8743	128.584	2001-01-01 01:00:00	2021-12-31 23:00:00
85	422115		Jisan-dong	35.8305	128.632	2002-01-01 01:00:00	2021-12-31 23:00:00
86	422121		Seoho-dong	35.8691	128.711	2002-11-27 01:00:00	2021-12-31 23:00:00
87	422132		Ihyeon-dong	35.8695	128.545	2001-01-01 01:00:00	2021-12-31 23:00:00
88	422141		Daemyeong-dong	35.8455	128.571	2001-01-01 01:00:00	2021-12-31 23:00:00
89	422153		Nowon-dong	35.8943	128.563	2001-01-01 01:00:00	2020-12-03 14:00:00
90	422154		Sinam-dong	35.8898	128.633	2001-01-01 01:00:00	2021-12-31 23:00:00
91	422161		Manchon-dong	35.8653	128.64	2001-01-01 01:00:00	2021-12-31 23:00:00
92	422171		Horim-dong	35.8379	128.489	2002-11-27 01:00:00	2021-12-31 23:00:00
93	422113		Namsan-dong	35.8654	128.591	2001-01-01 01:00:00	2013-12-31 23:00:00
94	422133		Pyeongni-dong	35.8803	128.562	2001-01-01 01:00:00	2021-12-31 23:00:00
95	339111	Jeju	Ido-dong	33.5001	126.532	2001-01-02 07:00:00	2021-12-31 23:00:00
96	339121		Donghong-dong	33.2465	126.565	2002-03-01 01:00:00	2021-12-31 23:00:00
97	339312		Gosal-ri (Gosan)	33.2925	126.162	2001-01-01 01:00:00	2021-12-31 23:00:00
98	533112	Chungcheongbuk	Songjeong-dong	36.6447	127.437	2001-01-01 01:00:00	2021-12-31 23:00:00
99	533113		Sacheon-dong	36.6661	127.475	2001-01-01 01:00:00	2021-12-31 23:00:00
100	533114		Yongdam-dong	36.6358	127.504	2002-08-01 01:00:00	2021-12-31 23:00:00
101	633122		Hoam-dong	36.9646	127.926	2002-06-01 01:00:00	2021-12-31 23:00:00
102	633131		Jangnak-dong	37.1451	128.221	2001-01-01 01:00:00	2021-12-31 23:00:00
103	534111	Chungcheongnam	Seonghwang-dong	36.8143	127.152	2001-01-03 11:00:00	2021-12-31 23:00:00
104	534421		Dokgot-ri	36.9897	126.385	2001-01-01 01:00:00	2021-12-31 23:00:00
105	534422		Dongmun-dong	36.7799	126.456	2001-01-01 01:00:00	2021-12-31 23:00:00
106	132112	Gangwon	Jungangno	37.8756	127.72	2001-07-03 10:00:00	2021-12-31 23:00:00
107	132113		Seoksa-dong	37.8571	127.749	2003-02-01 01:00:00	2021-12-31 23:00:00
108	632132		Okcheon-dong	37.76	128.903	2001-01-01 01:00:00	2021-12-31 23:00:00
109	632121		Jungang-dong	37.3528	127.947	2001-01-01 01:00:00	2021-12-31 23:00:00
110	632122		Bangok-dong	37.3356	127.977	2001-01-01 01:00:00	2021-12-31 23:00:00
111	632421		Ganseong-eup (Gosung)	38.2874	128.385	2001-02-08 17:00:00	2021-12-28 06:00:00
112	132401		Bangsan-myeon	38.2244	127.959	2001-01-01 01:00:00	2021-12-31 23:00:00
113	632371		Bukpyeong-myeon	37.4302	128.665	2004-08-01 01:00:00	2021-12-31 23:00:00
114	632431		Chiaksan	37.3601	128.125	2007-10-01 01:00:00	2021-12-31 23:00:00
115	131111	Gyeonggi	Sinpung-dong	37.2838	127.01	2001-01-01 01:00:00	2021-12-31 23:00:00
116	131112		Ingye-dong	37.2634	127.029	2001-01-01 01:00:00	2021-12-31 23:00:00
117	131113		Gwanggyo-dong	37.2913	127.071	2001-01-01 01:00:00	2021-12-31 23:00:00
118	131114		Yeongtong-dong	37.247	127.056	2002-05-01 01:00:00	2021-12-31 23:00:00
119	131141		Anyang6-dong	37.3901	126.931	2001-01-01 01:00:00	2021-12-31 23:00:00
120	131142		Burim-dong	37.3941	126.958	2001-01-01 01:00:00	2021-12-31 23:00:00
121	131144		Hogye-dong	37.3813	126.953	2001-01-01 01:00:00	2021-12-31 23:00:00
122	131145		Anyang2-dong	37.4051	126.918	2005-01-01 01:00:00	2021-12-31 23:00:00
123	131121		Dandae-dong	37.4494	127.155	2001-01-01 01:00:00	2021-12-31 23:00:00
124	131123		Jeongja-dong	37.3614	127.111	2001-01-27 01:00:00	2021-12-31 23:00:00
125	131131		Uijeongbu-dong	37.7356	127.041	2001-01-01 01:00:00	2021-12-31 23:00:00
126	131161		Cheolsan-dong	37.4786	126.865	2001-01-01 01:00:00	2021-12-31 23:00:00
127	131191		Gojan-dong	37.322	126.83	2001-01-01 01:00:00	2021-12-31 23:00:00
128	131192		Wonsi-dong	37.3346	126.812	2001-01-01 01:00:00	2021-12-31 23:00:00
129	131193		Bono-dong	37.2963	126.872	2001-01-01 01:00:00	2021-12-27 17:00:00
130	131194		Wongok-dong	37.3316	126.802	2001-01-01 01:00:00	2021-12-31 23:00:00
131	131195		Bugok-dong	37.3319	126.861	2001-07-01 01:00:00	2021-12-31 23:00:00
132	131196		Daebu-dong	37.2437	126.585	2002-03-01 01:00:00	2021-12-31 23:00:00
133	131341		Bijeon-dong	36.9923	127.113	2001-01-01 01:00:00	2021-12-31 23:00:00
134	131201		Byeollyang-dong	37.4239	126.994	2001-01-01 01:00:00	2021-12-31 23:00:00
135	131202		Gwacheon-dong	37.4491	127.002	2001-01-01 01:00:00	2021-12-31 23:00:00
136	131211		Gyomun-dong	37.5945	127.13	2001-01-01 01:00:00	2021-12-31 23:00:00
137	131212		Donggu-dong	37.6186	127.138	2002-04-01 01:00:00	2021-12-31 23:00:00
138	131222		Bugok3-dong	37.3194	126.95	2002-08-01 01:00:00	2021-12-31 23:00:00
139	131381		Haengsin-dong	37.6249	126.842	2001-01-01 01:00:00	2021-12-31 23:00:00
140	131382		Siksa-dong	37.6855	126.813	2002-11-01 01:00:00	2021-12-31 23:00:00
141	131501		Dang-dong	37.3537	126.945	2001-01-01 01:00:00	2021-12-31 23:00:00
142	131502		Sanbon-dong	37.3617	126.934	2002-05-01 01:00:00	2021-12-31 23:00:00
143	131231		Jeongwang-dong	37.3468	126.74	2001-01-02 19:00:00	2021-12-31 23:00:00
144	131232		Sihwasandan	37.3372	126.724	2001-01-01 01:00:00	2021-12-31 23:00:00
145	131233		Daeya-dong	37.4431	126.788	2002-03-01 01:00:00	2021-12-31 23:00:00
146	831151		Sosabon-dong	37.48	126.8	2001-01-01 01:00:00	2021-12-31 23:00:00
147	831152		Nae-dong	37.5203	126.774	2001-01-01 01:00:00	2021-12-31 23:00:00
148	831153		Jung2-dong	37.4939	126.77	2001-01-01 01:00:00	2021-12-31 23:00:00
149	831154		Ojeong-dong	37.528	126.796	2002-04-01 01:00:00	2021-12-31 23:00:00
150	131241		Geumgok-dong	37.6356	127.216	2001-01-01 01:00:00	2021-12-31 23:00:00
151	131411		Gimnyangjang-dong	37.2345	127.201	2001-01-03 01:00:00	2021-12-31 23:00:00
152	131471		Sau-dong	37.6193	126.717	2001-01-01 01:00:00	2021-12-31 23:00:00
153	131472		Gochon-eup	37.6067	126.763	2002-01-01 01:00:00	2021-12-31 23:00:00
154	131473		Wolgot-myeon	37.7151	126.553	2002-01-01 01:00:00	2021-12-31 23:00:00
155	131531		Osan-dong	37.1592	127.077	2002-03-01 01:00:00	2021-12-31 23:00:00
156	131541		Sinjang-dong	37.5391	127.215	2002-03-01 12:00:00	2021-12-31 23:00:00
157	437112	Gyeongsangbuk	Jangheung-dong	35.9802	129.375	2001-01-01 01:00:00	2021-12-31 23:00:00
158	437113		Jangnyang-dong	36.0707	129.38	2001-01-01 01:00:00	2021-12-31 23:00:00
159	437151		Gongdan-dong	36.1019	128.386	2001-01-01 01:00:00	2021-12-31 23:00:00
160	437152		Wonpyeong-dong	36.1308	128.326	2001-01-01 01:00:00	2021-12-31 23:00:00
161	437153		Hyeonggok-dong	36.1108	128.339	2001-01-01 01:00:00	2021-12-31 23:00:00
162	437131		Mundang-dong	36.1446	128.088	2001-01-01 01:00:00	2021-12-31 23:00:00
163	437122		Seonggeon-dong	35.8507	129.208	2001-01-02 16:00:00	2021-12-31 23:00:00
164	437141		Myeongnyun-dong	36.5683	128.728	2001-01-01 01:00:00	2021-12-31 23:00:00
165	437161		Gaheung-dong	36.8212	128.613	2001-06-01 01:00:00	2021-12-31 23:00:00
166	437402		Yeongcheon-si	35.9729	128.938	2019-01-07 01:00:00	2021-12-31 23:00:00
167	437541		Taeha-ri	37.5223	130.797	2001-01-01 01:00:00	2021-12-31 23:00:00
168	238111	Gyeongsangnam	Hoewon-dong	35.2181	128.574	2001-01-01 01:00:00	2021-12-31 23:00:00
169	238112		Bongam-dong	35.2176	128.602	2001-01-01 01:00:00	2021-12-31 23:00:00
170	238141		Myeongseo-dong	35.2403	128.644	2001-01-01 01:00:00	2021-12-31 23:00:00
171	238142		Ungnam-dong	35.2115	128.657	2001-02-05 11:00:00	2021-12-31 23:00:00
172	238143		Seongju-dong	35.1994	128.711	2001-01-01 01:00:00	2021-12-31 23:00:00
173	238151		Gyeonghwa-dong	35.155	128.69	2001-01-01 01:00:00	2021-12-31 23:00:00
174	238131		Sangbong-dong	35.1983	128.078	2001-01-01 01:00:00	2021-12-31 23:00:00
175	238181		Dongsang-dong	35.2369	128.883	2001-01-01 02:00:00	2021-12-31 23:00:00
176	238361		Bukbu-dong	35.3458	129.041	2001-02-20 01:00:00	2021-12-31 23:00:00
177	335115	Jeollabuk	Nosong-dong	35.8287	127.148	2003-09-01 01:00:00	2021-12-31 23:00:00
178	735111		Samcheon-dong	35.799	127.122	2001-01-01 01:00:00	2021-12-31 23:00:00
179	735114		Palbok-dong	35.8515	127.087	2001-01-01 02:00:00	2021-12-31 23:00:00
180	735121		Sinpung-dong	35.9729	126.701	2001-01-01 01:00:00	2021-12-31 23:00:00
181	735122		Soryong-dong	35.9733	126.651	2001-01-01 01:00:00	2021-12-31 23:00:00
182	735123		Gaejeong-dong	35.9644	126.755	2001-01-01 01:00:00	2021-12-31 23:00:00
183	735132		Namjung-dong	35.9483	126.958	2001-01-01 01:00:00	2019-12-06 13:00:00
184	735151		Jukang-dong	35.4076	127.385	2002-07-01 01:00:00	2021-12-31 23:00:00
185	336121	Jeollanam	Seogang-dong	34.7411	127.726	2001-01-01 01:00:00	2021-12-31 23:00:00
186	336124		Wollae-dong	34.8502	127.725	2001-01-01 01:00:00	2021-12-31 23:00:00
187	336352		Jung-dong	34.9399	127.698	2001-01-03	2021-12-31 23:00:00
188	336353		Taein-dong	34.9419	127.757	2001-01-01 01:00:00	2021-12-31 23:00:00
189	336354		Jinsang-myeon	35.02	127.72	2002-12-16 13:00:00	2021-07-02 09:00:00
190	336131		Jangcheon-dong	34.9476	127.489	2001-01-01 01:00:00	2021-12-31 23:00:00
191	336111		Yongdang-dong	34.806	126.392	2001-01-01 02:00:00	2021-12-31 23:00:00
192	336441		Nabul-ri	34.7668	126.439	2001-01-01 01:00:00	2021-12-31 23:00:00

## Sheet: missing
Index	Station code	City·Province	Site name	Missing start	Missing end
1	111123	Seoul	Jongno-gu	2001-10-04 10:00:00	2003-04-25 11:00:00
2	111123			2005-01-17 22:00:00	2005-02-28 23:00:00
3	111123			2010-11-22 12:00:00	2010-12-29 09:00:00
4	111131		Yongsan-gu	2001-03-05 16:00:00	2001-04-30 23:00:00
5	111131			2006-02-15 14:00:00	2006-04-07 13:00:00
6	111141		Gwangjin-gu	2007-03-02 15:00:00	2007-04-13 17:00:00
7	111141			2007-11-28 11:00:00	2007-12-31 23:00:00
8	111142		Seongdong-gu	2006-02-01 01:00:00	2006-03-31 23:00:00
9	111142			2007-07-12 16:00:00	2007-09-05 15:00:00
10	111151		Jungnang-gu	2001-04-30 14:00:00	2001-07-03 10:00:00
11	111151			2002-01-14 11:00:00	2002-02-22 11:00:00
12	111151			2019-09-20 15:00:00	2019-10-24 14:00:00
13	111152		Dongdaemun-gu	2001-12-26 10:00:00	2002-02-15 11:00:00
14	111152			2011-05-04 10:00:00	2011-06-03 16:00:00
15	111152			2019-09-20 16:00:00	2019-10-24 18:00:00
16	111161		Seongbuk-gu	2002-11-25 11:00:00	2003-03-25 11:00:00
17	111161			2006-02-27 16:00:00	2006-04-09 23:00:00
18	111191		Seodaemun-gu	2007-02-14 10:00:00	2007-03-16 23:00:00
19	111201		Mapo-gu	2001-12-27 14:00:00	2002-02-15 09:00:00
20	111201			2003-11-01 10:00:00	2004-06-17 09:00:00
21	111201			2019-09-16 16:00:00	2019-10-21 09:00:00
22	111212		Gangseo-gu	2007-01-10 15:00:00	2007-02-28 23:00:00
23	111231		Yeongdeungpo-gu	2001-12-27 12:00:00	2002-02-01 13:00:00
24	111241		Dongjak-gu	2005-01-17 15:00:00	2005-02-28 23:00:00
25	111251		Gwanak-gu	2001-12-27 10:00:00	2002-03-09 08:00:00
26	111261		Gangnam-gu	2001-12-26 09:00:00	2002-02-14 23:00:00
27	111261			2007-09-27 10:00:00	2008-03-12 10:00:00
28	111262		Seocho-gu	2001-03-05 17:00:00	2001-04-30 23:00:00
29	111273		Songpa-gu	2001-03-05 14:00:00	2001-04-30 23:00:00
30	111274		Gangdong-gu	2005-01-19 14:00:00	2005-02-28 23:00:00
31	111274			2010-06-17 12:00:00	2010-08-04 13:00:00
32	111281		Geumcheon-gu	2005-01-17 11:00:00	2005-02-28 23:00:00
33	111291		Gangbuk-gu	2005-01-20 15:00:00	2005-02-28 23:00:00
34	111301		Yangcheon-gu	2005-01-19 11:00:00	2005-02-28 23:00:00
35	111301			2015-08-18 12:00:00	2015-09-17 12:00:00
36	111311		Nowon-gu	2005-01-18 15:00:00	2005-02-28 23:00:00
37	823611	Incheon	Sinheung	2006-07-01 01:00:00	2006-11-01 02:00:00
38	823621		Songnim	2001-11-14 16:00:00	2001-12-31 22:00:00
39	823621			2007-01-01 01:00:00	2007-01-31 23:00:00
40	823621			2021-01-07 15:00:00	2021-03-23 16:00:00
41	823631		Guwol	2005-01-01 01:00:00	2008-03-31 23:00:00
42	823631			2017-07-19 12:00:00	2017-09-12 12:00:00
43	823632		Sungui	2006-08-01 01:00:00	2006-10-31 23:00:00
44	823632			2007-12-21 10:00:00	2008-03-31 23:00:00
45	823632			2018-04-27 10:00:00	2018-05-31 12:00:00
46	823641		Bupyeong	2006-08-01 01:00:00	2006-10-31 23:00:00
47	823641			2014-04-30 11:00:00	2014-07-16 16:00:00
48	823651		Yeonhui	2005-01-01 01:00:00	2005-02-28 23:00:00
49	823671		Gojan	2007-12-17 17:00:00	2008-03-31 23:00:00
50	823671			2009-05-25 06:00:00	2009-07-31 23:00:00
51	823671			2018-12-22 10:00:00	2019-01-23 08:00:00
52	823671			2020-07-08 09:00:00	2020-09-11 12:00:00
53	823681		Seongnam	2008-06-25 11:00:00	2008-09-30 23:00:00
54	823681			2019-06-05 10:00:00	2019-07-30 12:00:00
55	823691		Songhae	2009-06-01 01:00:00	2009-07-31 23:00:00
56	823691			2020-06-11 09:00:00	2020-10-15 14:00:00
57	823633		Seokbawi	2008-06-25 11:00:00	2008-09-30 23:00:00
58	823633			2019-06-03 10:00:00	2019-07-30 12:00:00
59	525112	Daejeon	Munpyeong-dong	2002-06-17 18:00:00	2002-10-01 09:00:00
60	324121	Gwangju	Nongseong-dong	2001-06-23 05:00:00	2001-07-26 15:00:00
61	324121			2014-12-18 10:00:00	2015-12-02 12:00:00
62	221181	Busan	Hakjang-dong	2010-05-25 11:00:00	2010-06-30 23:00:00
63	221182		Deokcheon-dong	2003-01-27 14:00:00	2003-07-31 23:00:00
64	221182			2005-01-31 17:00:00	2005-06-30 23:00:00
65	221152		Jeonpo-dong	2003-06-27 11:00:00	2003-07-31 23:00:00
66	221221		Yeonsan-dong	2009-06-26 11:00:00	2009-08-20 18:00:00
67	221221			2018-01-10 08:00:00	2018-03-20 23:00:00
68	221231		Gijang-eup	2012-02-15 16:00:00	2012-03-31 23:00:00
69	221271		Gwangan-dong	2017-04-18 11:00:00	2017-06-21 10:00:00
70	238121	Ulsan	Seongnam-dong	2001-02-20 18:00:00	2001-04-15 08:00:00
71	238121			2001-11-22 13:00:00	2002-07-31 23:00:00
72	238122		Bugok-dong	2001-11-22 11:00:00	2002-02-28 23:00:00
73	238122			2002-06-01 01:00:00	2002-08-02 11:00:00
74	238124		Yaeum-dong	2008-08-06 12:00:00	2008-11-11 17:00:00
75	238125		Samsan-dong	2021-04-30 10:00:00	2021-06-03 08:00:00
76	238127		Sinjeong-dong	2002-10-31 21:00:00	2002-11-30 23:00:00
77	238128		Deoksil-ri	2001-11-10 01:00:00	2002-01-18 23:00:00
78	238129		Mugeo-dong	2020-05-11 10:00:00	2020-06-11 07:00:00
79	238373		Sangnam-ri	2004-05-02 19:00:00	2005-11-30 23:00:00
80	238126		Sinjeongno	2001-08-15 04:00:00	2002-06-30 23:00:00
81	238126			2004-06-18 02:00:00	2004-09-30 23:00:00
82	238126			2004-11-01 01:00:00	2005-12-07 10:00:00
83	422114	Daegu	Suchang-dong	2005-08-06 17:00:00	2005-11-30 23:00:00
84	422114			2007-08-10 13:00:00	2007-09-11 13:00:00
85	422114			2016-10-17 13:00:00	2016-12-26 23:00:00
86	422115		Jisan-dong	2005-09-14 11:00:00	2005-10-31 23:00:00
87	422115			2017-08-23 09:00:00	2017-11-06 10:00:00
88	422115			2018-02-19 11:00:00	2018-04-30 16:00:00
89	422121		Seoho-dong	2009-06-11 14:00:00	2009-08-10 08:00:00
90	422121			2020-08-11 11:00:00	2020-11-02 15:00:00
91	422132		Ihyeon-dong	2002-04-28 12:00:00	2004-04-28 14:00:00
92	422132			2005-07-27 18:00:00	2005-11-30 23:00:00
93	422132			2016-10-25 14:00:00	2016-12-26 23:00:00
94	422141		Daemyeong-dong	2005-08-06 17:00:00	2005-11-30 23:00:00
95	422141			2016-10-11 14:00:00	2016-12-26 23:00:00
96	422153		Nowon-dong	2001-03-22 20:00:00	2001-04-26 14:00:00
97	422153			2001-06-21 14:00:00	2001-09-26 13:00:00
98	422153			2004-03-01 01:00:00	2004-03-31 22:00:00
99	422153			2007-08-21 12:00:00	2007-10-31 23:00:00
100	422153			2018-09-18 11:00:00	2018-12-05 08:00:00
101	422154		Sinam-dong	2005-09-12 01:00:00	2005-11-30 23:00:00
102	422154			2017-08-21 10:00:00	2017-11-06 08:00:00
103	422161		Manchon-dong	2006-08-09 01:00:00	2006-09-30 23:00:00
104	422161			2017-08-16 12:00:00	2017-11-06 08:00:00
105	422171		Horim-dong	2011-07-11 14:00:00	2011-09-20 23:00:00
106	422171			2014-01-09 16:00:00	2014-07-29 07:00:00
107	422113		Namsan-dong	2002-08-27 01:00:00	2002-10-01 19:00:00
108	422113			2005-08-01 01:00:00	2005-09-07 15:00:00
109	422113			2008-12-10 11:00:00	2009-01-31 23:00:00
110	422133		Pyeongni-dong	2001-03-23 13:00:00	2001-06-21 23:00:00
111	422133			2009-06-11 11:00:00	2009-08-10 08:00:00
112	422133			2020-08-11 15:00:00	2020-11-02 15:00:00
113	339312	Jeju	Gosal-ri (Gosan)	2001-01-26 10:00:00	2001-05-16 17:00:00
114	339312			2012-03-01 01:00:00	2012-06-08 23:00:00
115	533112	Chungcheongbuk	Songjeong-dong	2002-12-01 01:00:00	2002-12-31 23:00:00
116	533112			2020-05-27 11:00:00	2020-06-30 23:00:00
117	533113		Sacheon-dong	2002-12-01 01:00:00	2002-12-31 23:00:00
118	533113			2005-06-01 01:00:00	2005-08-31 23:00:00
119	533113			2014-01-01 01:00:00	2014-01-31 23:00:00
120	533113			2016-07-26 07:00:00	2016-08-31 23:00:00
121	533114		Yongdam-dong	2002-09-01 01:00:00	2003-01-31 23:00:00
122	533114			2012-07-30 06:00:00	2012-08-31 23:00:00
123	533114			2019-11-01 01:00:00	2020-02-29 23:00:00
124	633122		Hoam-dong	2008-09-30 10:00:00	2008-10-31 23:00:00
125	633131		Jangnak-dong	2013-10-01 01:00:00	2013-10-31 23:00:00
126	633131			2020-05-25 13:00:00	2020-06-30 23:00:00
127	534111	Chungcheongnam	Seonghwang-dong	2020-03-01 01:00:00	2020-06-03 23:00:00
128	534111			2021-10-20 11:00:00	2021-11-30 23:00:00
129	534422		Dongmun-dong	2020-09-04 15:00:00	2020-10-31 23:00:00
130	132112	Gangwon	Jungangno	2020-08-10 01:00:00	2020-10-31 23:00:00
131	132113		Seoksa-dong	2007-11-20 12:00:00	2007-12-31 23:00:00
132	132113			2015-12-15 10:00:00	2017-01-31 23:00:00
133	632132		Okcheon-dong	2008-09-30 10:00:00	2008-10-31 23:00:00
134	632132			2018-10-02 12:00:00	2018-11-06 23:00:00
135	632132			2019-10-21 01:00:00	2019-11-30 23:00:00
136	632121		Jungang-dong	2018-10-02 16:00:00	2018-11-06 23:00:00
137	632122		Bangok-dong	2002-10-21 19:00:00	2002-12-31 23:00:00
138	632122			2020-04-17 01:00:00	2020-07-01 12:00:00
139	632421		Ganseong-eup (Gosung)	2001-03-30 01:00:00	2001-05-17 15:00:00
140	632421			2007-11-01 01:00:00	2008-03-31 23:00:00
141	632421			2011-03-31 14:00:00	2011-08-31 23:00:00
142	632421			2019-01-16 16:00:00	2019-04-30 23:00:00
143	632421			2021-03-24 13:00:00	2021-05-17 16:00:00
144	132401		Bangsan-myeon	2003-03-01 01:00:00	2003-03-31 23:00:00
145	132401			2007-10-01 01:00:00	2008-03-31 23:00:00
146	132401			2019-01-15 15:00:00	2019-04-30 23:00:00
147	632371		Bukpyeong-myeon	2016-09-01 01:00:00	2016-11-30 23:00:00
148	632431		Chiaksan	2017-10-19 14:00:00	2018-01-21 23:00:00
149	131111	Gyeonggi	Sinpung-dong	2016-10-14 11:00:00	2016-12-27 17:00:00
150	131111			2017-07-01 01:00:00	2017-07-31 23:00:00
151	131113		Gwanggyo-dong	2013-05-30 17:00:00	2013-09-26 12:00:00
152	131141		Anyang6-dong	2015-07-01 01:00:00	2015-07-31 23:00:00
153	131142		Burim-dong	2019-07-16 11:00:00	2019-08-21 15:00:00
154	131144		Hogye-dong	2015-06-26 15:00:00	2015-07-31 23:00:00
155	131123		Jeongja-dong	2017-12-01 09:00:00	2018-11-05 16:00:00
156	131161		Cheolsan-dong	2004-04-28 13:00:00	2004-07-16 14:00:00
157	131191		Gojan-dong	2019-12-06 15:00:00	2020-01-08 15:00:00
158	131192		Wonsi-dong	2010-09-02 06:00:00	2010-11-02 14:00:00
159	131192			2013-10-28 11:00:00	2013-11-30 23:00:00
160	131192			2015-07-17 14:00:00	2015-08-20 17:00:00
161	131193		Bono-dong	2020-07-20 11:00:00	2020-10-21 07:00:00
162	131194		Wongok-dong	2004-01-01 01:00:00	2004-01-31 23:00:00
163	131194			2020-04-02 14:00:00	2021-06-23 23:00:00
164	131341		Bijeon-dong	2011-11-14 14:00:00	2011-12-26 15:00:00
165	131211		Gyomun-dong	2015-09-18 16:00:00	2015-10-29 19:00:00
166	131222		Bugok3-dong	2015-10-22 14:00:00	2015-12-01 15:00:00
167	131222			2021-03-19 11:00:00	2021-04-30 23:00:00
168	131382		Siksa-dong	2002-11-30 20:00:00	2002-12-31 23:00:00
169	131382			2021-08-20 14:00:00	2021-09-30 23:00:00
170	131501		Dang-dong	2019-07-19 12:00:00	2019-08-21 15:00:00
171	131232		Sihwasandan	2020-11-17 16:00:00	2021-02-03 16:00:00
172	131233		Daeya-dong	2002-07-21 23:00:00	2002-09-01
173	831151		Sosabon-dong	2006-03-20 01:00:00	2006-09-30 23:00:00
174	131411		Gimnyangjang-dong	2001-06-17 18:00:00	2001-07-19 14:00:00
175	131411			2001-11-05 11:00:00	2002-02-18 09:00:00
176	131411			2021-07-05 10:00:00	2021-09-30 23:00:00
177	131471		Sau-dong	2020-08-25 15:00:00	2020-09-25 15:00:00
178	437112	Gyeongsangbuk	Jangheung-dong	2014-12-01 01:00:00	2014-12-31 23:00:00
179	437112			2015-12-01 01:00:00	2015-12-31 23:00:00
180	437113			2010-05-11 11:00:00	2010-06-23 23:00:00
181	437113			2015-12-01 01:00:00	2015-12-31 23:00:00
182	437151		Gongdan-dong	2007-07-13 10:00:00	2007-08-23 23:00:00
183	437151			2009-05-25 01:00:00	2009-06-30 23:00:00
184	437151			2016-07-11 12:00:00	2016-08-31 23:00:00
185	437152		Wonpyeong-dong	2010-06-14 17:00:00	2010-07-31 23:00:00
186	437153		Hyeonggok-dong	2009-05-11 01:00:00	2009-06-30 23:00:00
187	437153		Hyeonggok-dong	2020-10-19 15:00:00	2020-12-27 23:00:00
188	437131		Mundang-dong	2017-09-15 01:00:00	2017-10-16 13:00:00
189	437122		Seonggeon-dong	2005-10-18 15:00:00	2005-12-11 23:00:00
190	437141		Myeongnyun-dong	2018-11-13 17:00:00	2019-02-14 10:00:00
191	437161		Gaheung-dong	2003-10-02 11:00:00	2003-12-31 23:00:00
192	437161			2019-12-16 19:00:00	2020-01-17 23:00:00
193	437541		Taeha-ri (Ulleung Island)	2009-11-01 01:00:00	2010-01-31 23:00:00
194	437541			2011-03-30 16:00:00	2011-06-30 23:00:00
195	437541			2019-09-17 15:00:00	2019-12-15 23:00:00
196	238111	Gyeongsangnam	Hoewon-dong	2016-07-05 10:00:00	2016-08-31 23:00:00
197	238112		Bongam-dong	2017-08-08 07:00:00	2017-11-07 23:00:00
198	238141		Myeongseo-dong	2021-06-11 09:00:00	2021-09-01 23:00:00
199	238142		Ungnam-dong	2001-07-08 17:00:00	2001-11-01 23:00:00
200	238142			2001-11-21 13:00:00	2002-07-31 23:00:00
201	238142			2010-08-10 17:00:00	2010-09-30 23:00:00
202	238142			2021-06-05 15:00:00	2021-09-01 23:00:00
203	238143		Seongju-dong	2018-12-14 14:00:00	2019-03-07 23:00:00
204	238143			2021-06-18 10:00:00	2021-09-01 23:00:00
205	238151		Gyeonghwa-dong	2006-01-19	2006-02-21 12:00:00
206	238151			2011-06-14 10:00:00	2011-09-25 23:00:00
207	238151			2012-10-29 15:00:00	2012-12-31 23:00:00
208	238131		Sangbong-dong	2011-06-20 12:00:00	2011-09-25 23:00:00
209	238131			2021-03-22 08:00:00	2021-08-09 16:00:00
210	238181		Dongsang-dong	2020-09-15 10:00:00	2020-11-12 23:00:00
211	238361		Bukbu-dong	2001-12-21 09:00:00	2002-02-05 16:00:00
212	238361			2002-03-14 16:00:00	2002-08-07 12:00:00
213	238361			2002-12-01 01:00:00	2003-01-01
214	238361			2003-11-11 16:00:00	2004-02-04 17:00:00
215	238361			2004-03-01 01:00:00	2005-07-31 23:00:00
216	238361			2010-08-16 15:00:00	2010-09-30 23:00:00
217	238361			2012-10-30 11:00:00	2012-12-31 23:00:00
218	238361			2021-06-15 09:00:00	2021-09-01 23:00:00
219	335115	Jeollabuk	Nosong-dong	2003-10-01 01:00:00	2004-04-30 22:00:00
220	735111		Samcheon-dong	2006-11-15 12:00:00	2006-12-31 23:00:00
221	735114		Palbok-dong	2010-06-29 14:00:00	2010-07-31 23:00:00
222	735121		Sinpung-dong	2001-03-01 01:00:00	2001-05-12 01:00:00
223	735121			2001-12-18 05:00:00	2002-05-28 23:00:00
224	735121			2002-06-10 15:00:00	2002-11-02 10:00:00
225	735122		Soryong-dong	2006-09-19 15:00:00	2006-12-14 11:00:00
226	735123		Gaejeong-dong	2021-10-14 10:00:00	2021-11-30 23:00:00
227	735132		Namjung-dong	2001-02-15 01:00:00	2001-03-28 18:00:00
228	735132			2011-08-29 15:00:00	2011-09-30 23:00:00
229	735151		Jukang-dong	2002-09-27 14:00:00	2003-08-31 23:00:00
230	735151			2003-10-01 01:00:00	2004-02-29 23:00:00
231	735151			2004-03-31 19:00:00	2004-09-30 23:00:00
232	735151			2012-05-30 08:00:00	2012-08-15 23:00:00
233	336121	Jeollanam	Seogang-dong	2002-06-29 13:00:00	2002-07-31 23:00:00
234	336121			2017-12-01 01:00:00	2017-12-31 23:00:00
235	336124		Wollae-dong	2006-06-01 20:00:00	2006-09-04 12:00:00
236	336124			2017-08-15 21:00:00	2017-11-30 23:00:00
237	336352		Jung-dong	2002-07-01 01:00:00	2002-07-31 23:00:00
238	336352			2018-09-11 12:00:00	2019-01-31 23:00:00
239	336353		Taein-dong	2017-03-01 01:00:00	2017-04-10 17:00:00
240	336353			2018-01-16 15:00:00	2018-04-30 23:00:00
241	336131		Jangcheon-dong	2006-12-20 11:00:00	2007-02-02 14:00:00
242	336131			2017-09-08 09:00:00	2018-01-08 23:00:00
243	336111		Yongdang-dong	2016-09-01 01:00:00	2016-10-31 23:00:00
244	336441		Nabul-ri	2002-07-01 01:00:00	2002-07-31 23:00:00
245	336441			2010-06-18 01:00:00	2010-07-31 23:00:00
246	336441			2021-03-01 01:00:00	2021-04-30 23:00:00
