# Supplementary material for: Changes in surface ozone in South Korea on diurnal to decadal time scale for the period of 2001–2021
Source: Copernicus journal article supplement (doi:10.5194/acp-2022-788), 2022-12-12
Supplement: Supplementary file 2 [file KoreanO3_Kimetal_2022_SI3_TropomiAnalysis.pdf › Supplementary/KoreanO3_Kimetal_2022_SI3_TropomiAnalysis.pdf]

## Supporting Information 3

### Changes in surface ozone in South Korea on diurnal to decadal time scale for the period of 2001-2021

Si-Wan Kim<sup>1</sup>, Kyoung-Min Kim<sup>2</sup>, Yujoo Jeong<sup>1,2</sup>, Seunghwan Seo<sup>2</sup>, Yeonsu Park<sup>2</sup>, and Jeongyeon Kim<sup>2</sup>

<sup>1</sup>Irreversible Climate Change Research Center, Yonsei University, Seoul, South Korea

<sup>2</sup>Department of Atmospheric Sciences, Yonsei University, Seoul, South Korea

\*Corresponding author. E-mail: [siwan.kim@yonsei.ac.kr](mailto:siwan.kim@yonsei.ac.kr)

This supporting information includes one slide introducing TROPOMI tropospheric NO<sub>2</sub> product and 6 figures listed below.

Slide 1. Introduction of KNMI & NASA TROPOMI NO<sub>2</sub> Trop. VCDs product

Figure S1. Figure S1. (Left) KNMI tropospheric NO<sub>2</sub> columns in 2019 and differences between 2020 and 2019 or 2021 and 2019, (Right) NASA data. The data with quality assurance > 0.50 and cloud radiance fraction < 0.4 are selected for analysis.

Figure S2. (Left) KNMI tropospheric NO<sub>2</sub> columns in 2019, 2020 and 2021, (Right) NASA data. The data with quality assurance > 0.50 and cloud radiance fraction < 0.4 are selected for analysis.

Figure S3. The number of days with available satellite data after filtering: (Left) KNMI tropospheric NO<sub>2</sub> columns, (Right) NASA data. The data with quality assurance > 0.50 and cloud radiance fraction < 0.4 are selected for analysis.

Figure S4. (Left) KNMI tropospheric NO<sub>2</sub> columns in 2019 and differences between 2020 and 2019 or 2021 and 2019, (Right) NASA data. The data with quality assurance > 0.75 and cloud radiance fraction < 0.5 are selected for analysis.

Figure S5. (Left) KNMI tropospheric NO<sub>2</sub> columns in 2019, 2020 and 2021, (Right) NASA data. The data with quality assurance > 0.75 and cloud radiance fraction < 0.5 are selected for analysis.

Figure S6. The number of days with available satellite data after filtering: (Left) KNMI tropospheric NO<sub>2</sub> columns, (Right) NASA data. The data with quality assurance > 0.75 and cloud radiance fraction < 0.5 are selected for analysis.

# Introduction of KNMI & NASA TROPOMI NO<sub>2</sub> Trop. VCDs product

## 1. KNMI product

- Retrieval process (README file of TROPOMI L2 data)

QA4ECV (Boersma et al., 2018, AMT) (until Dec. 2020)

**+ an overall reduction of the observed cloud pressures, resulting in a decrease of AMFs and a substantial increase of NO<sub>2</sub> in the retrievals in polluted regions** (since Jan. 2021)

- Change in horizontal resolution

7.0 km x 3.5km to 5.5 km x 3.5 km at NADIR (since August 06, 2019)

## 2. NASA MINDS product (introduced in Nov. 2022)

- Retrieval process (Lok et al., AGU 2021 & README file of MINDS TROP. NO<sub>2</sub> TROPOMI)

NASA Standard Product version 4.0 (Lok et al., 2021, AMT) – MOST RECENT retrieval process used

**+ created high resolution (0.25° latitude x 0.25° longitude) a priori NO<sub>2</sub> profiles and other auxiliary information from a global GMI-Replay simulation with satellite simulator [TROPOMI NO<sub>2</sub> SCD data operational ESA/KNMI product, version 2.3.1]**

- Consistent horizontal resolution (2018.05 – 2021.12)

5.5 km x 3.5 km at NADIR

# Absolute Values

## KNMI product w/ original filter

## NASA product w/ original filter

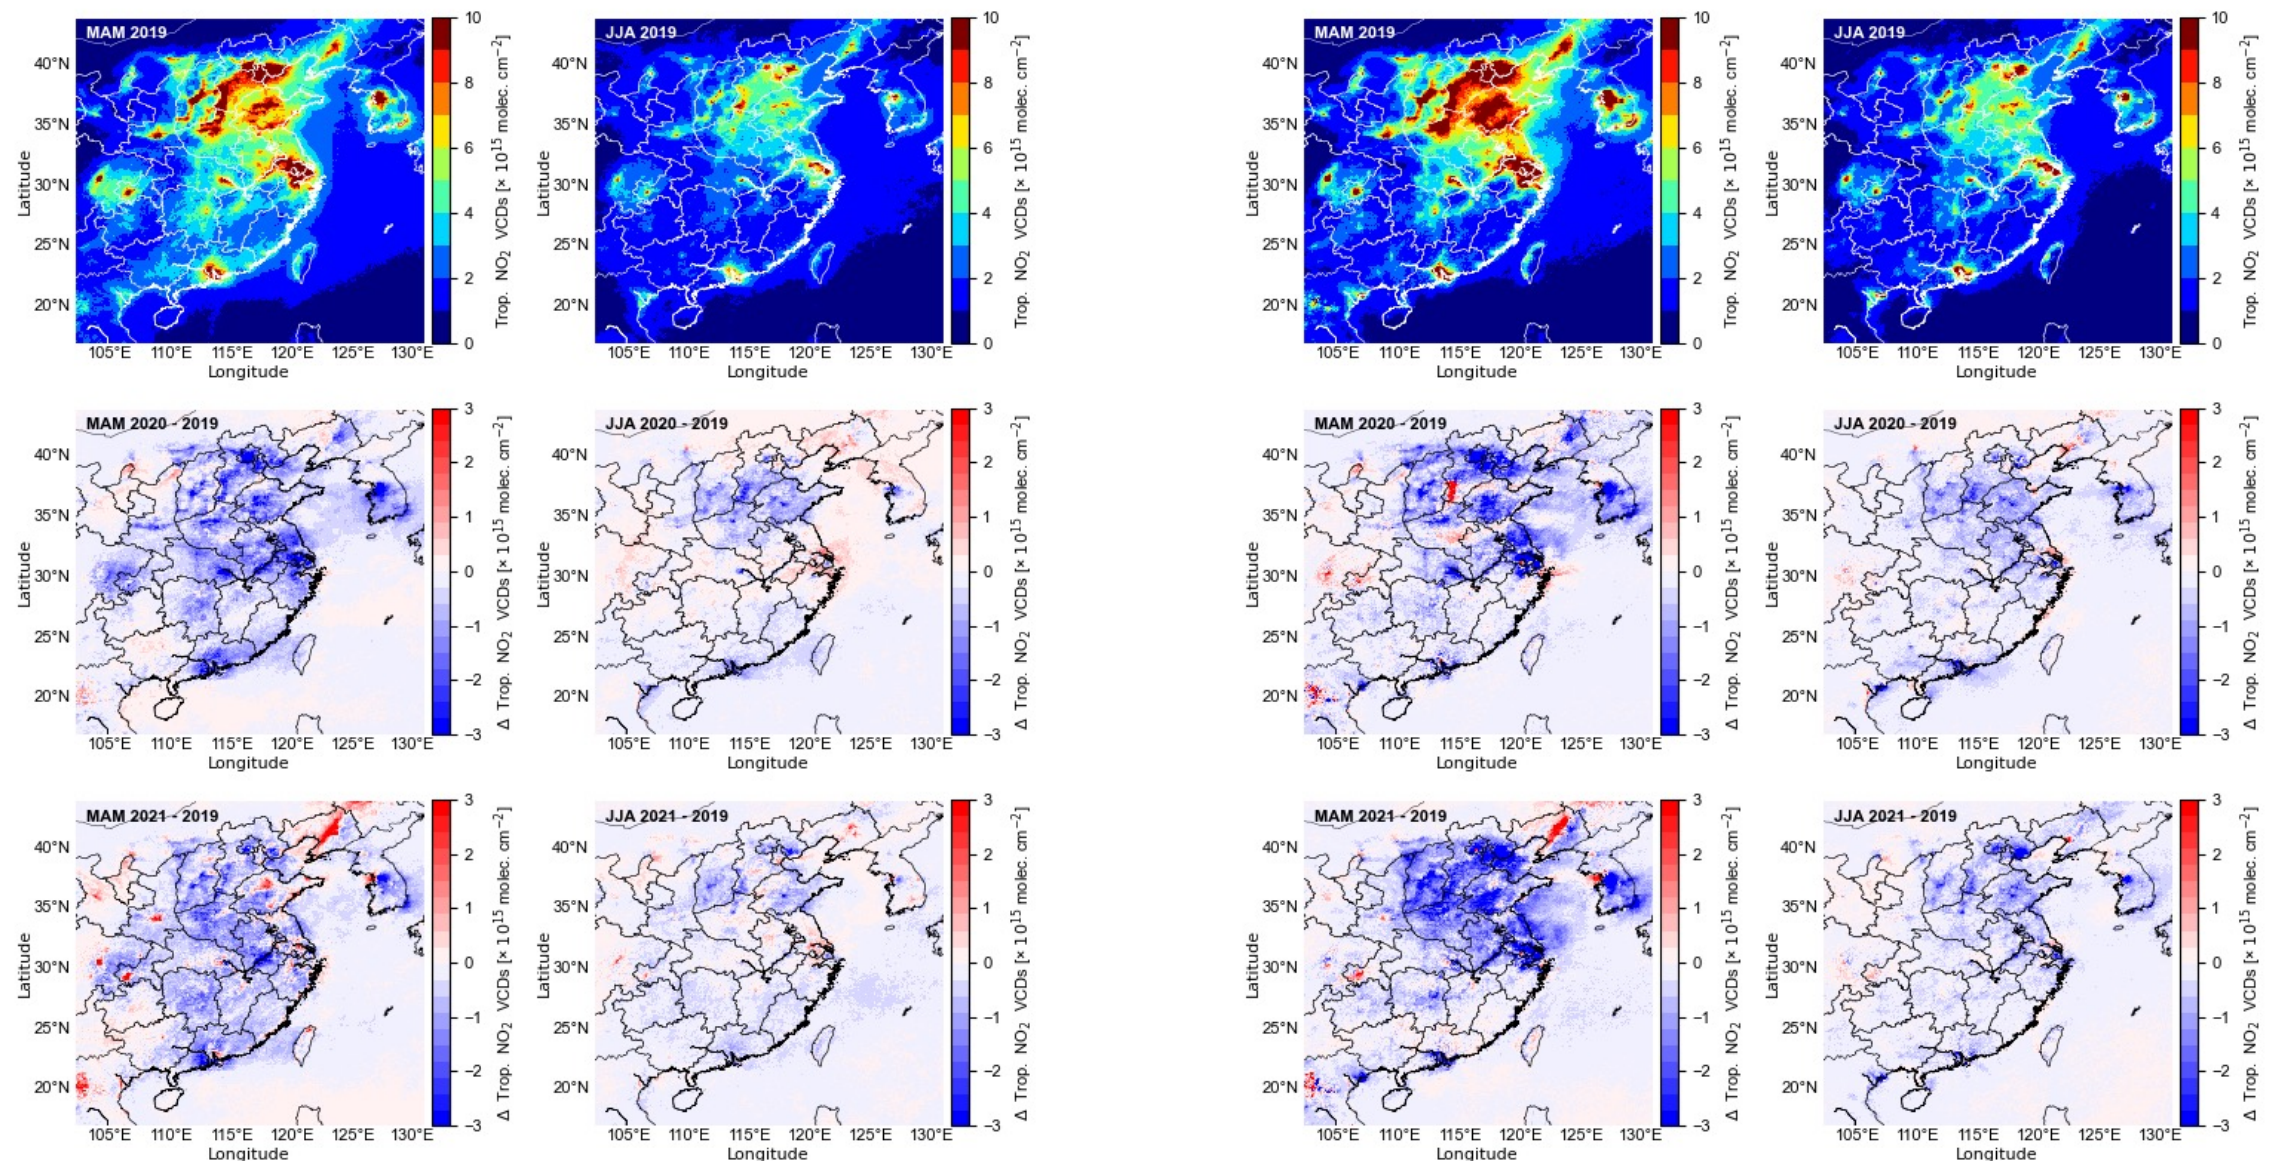

Figure S1. (Left) KNMI tropospheric NO<sub>2</sub> columns in 2019 and differences between 2020 and 2019 or 2021 and 2019, (Right) NASA data. The data with quality assurance > 0.50 and cloud radiance fraction < 0.4 are selected for analysis.

# Absolute Values

## KNMI product w/ original filter

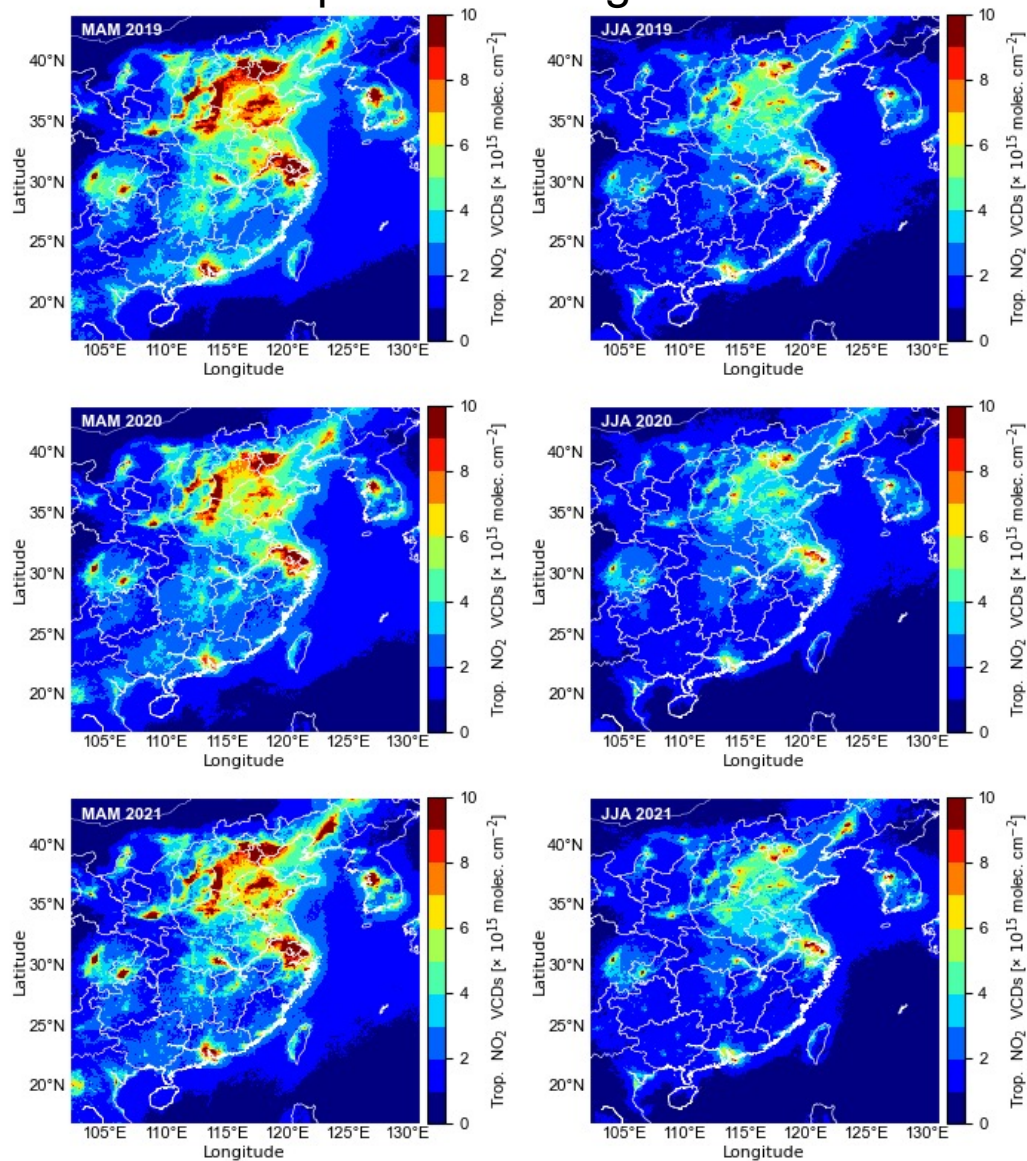

## NASA product w/ original filter

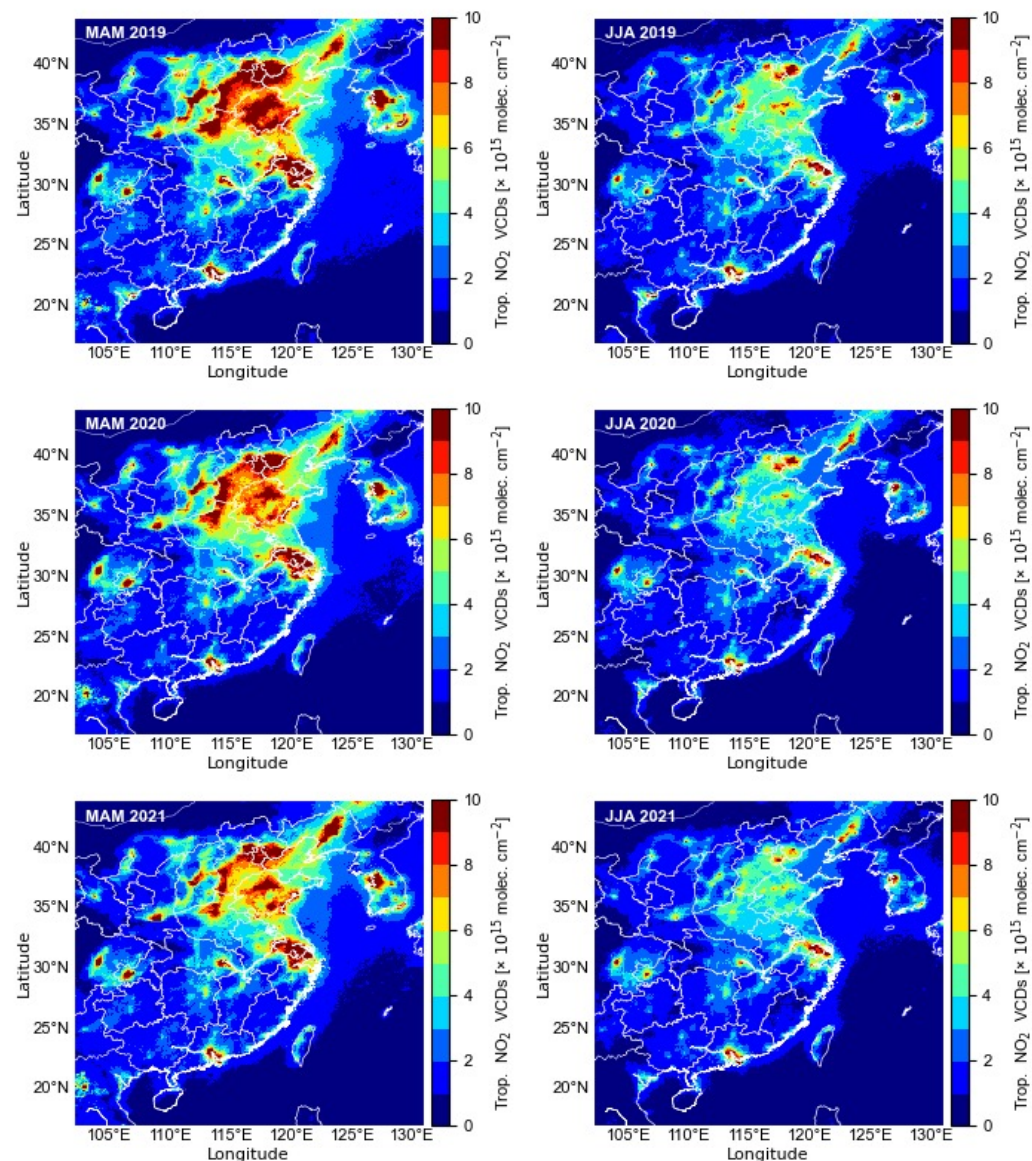

Figure S2. (Left) KNMI tropospheric NO<sub>2</sub> columns in 2019, 2020 and 2021, (Right) NASA data. The data with quality assurance > 0.50 and cloud radiance fraction < 0.4 are selected for analysis.

Days available from  
daily product      KNMI product w/ original filter

NASA product w/ original filter

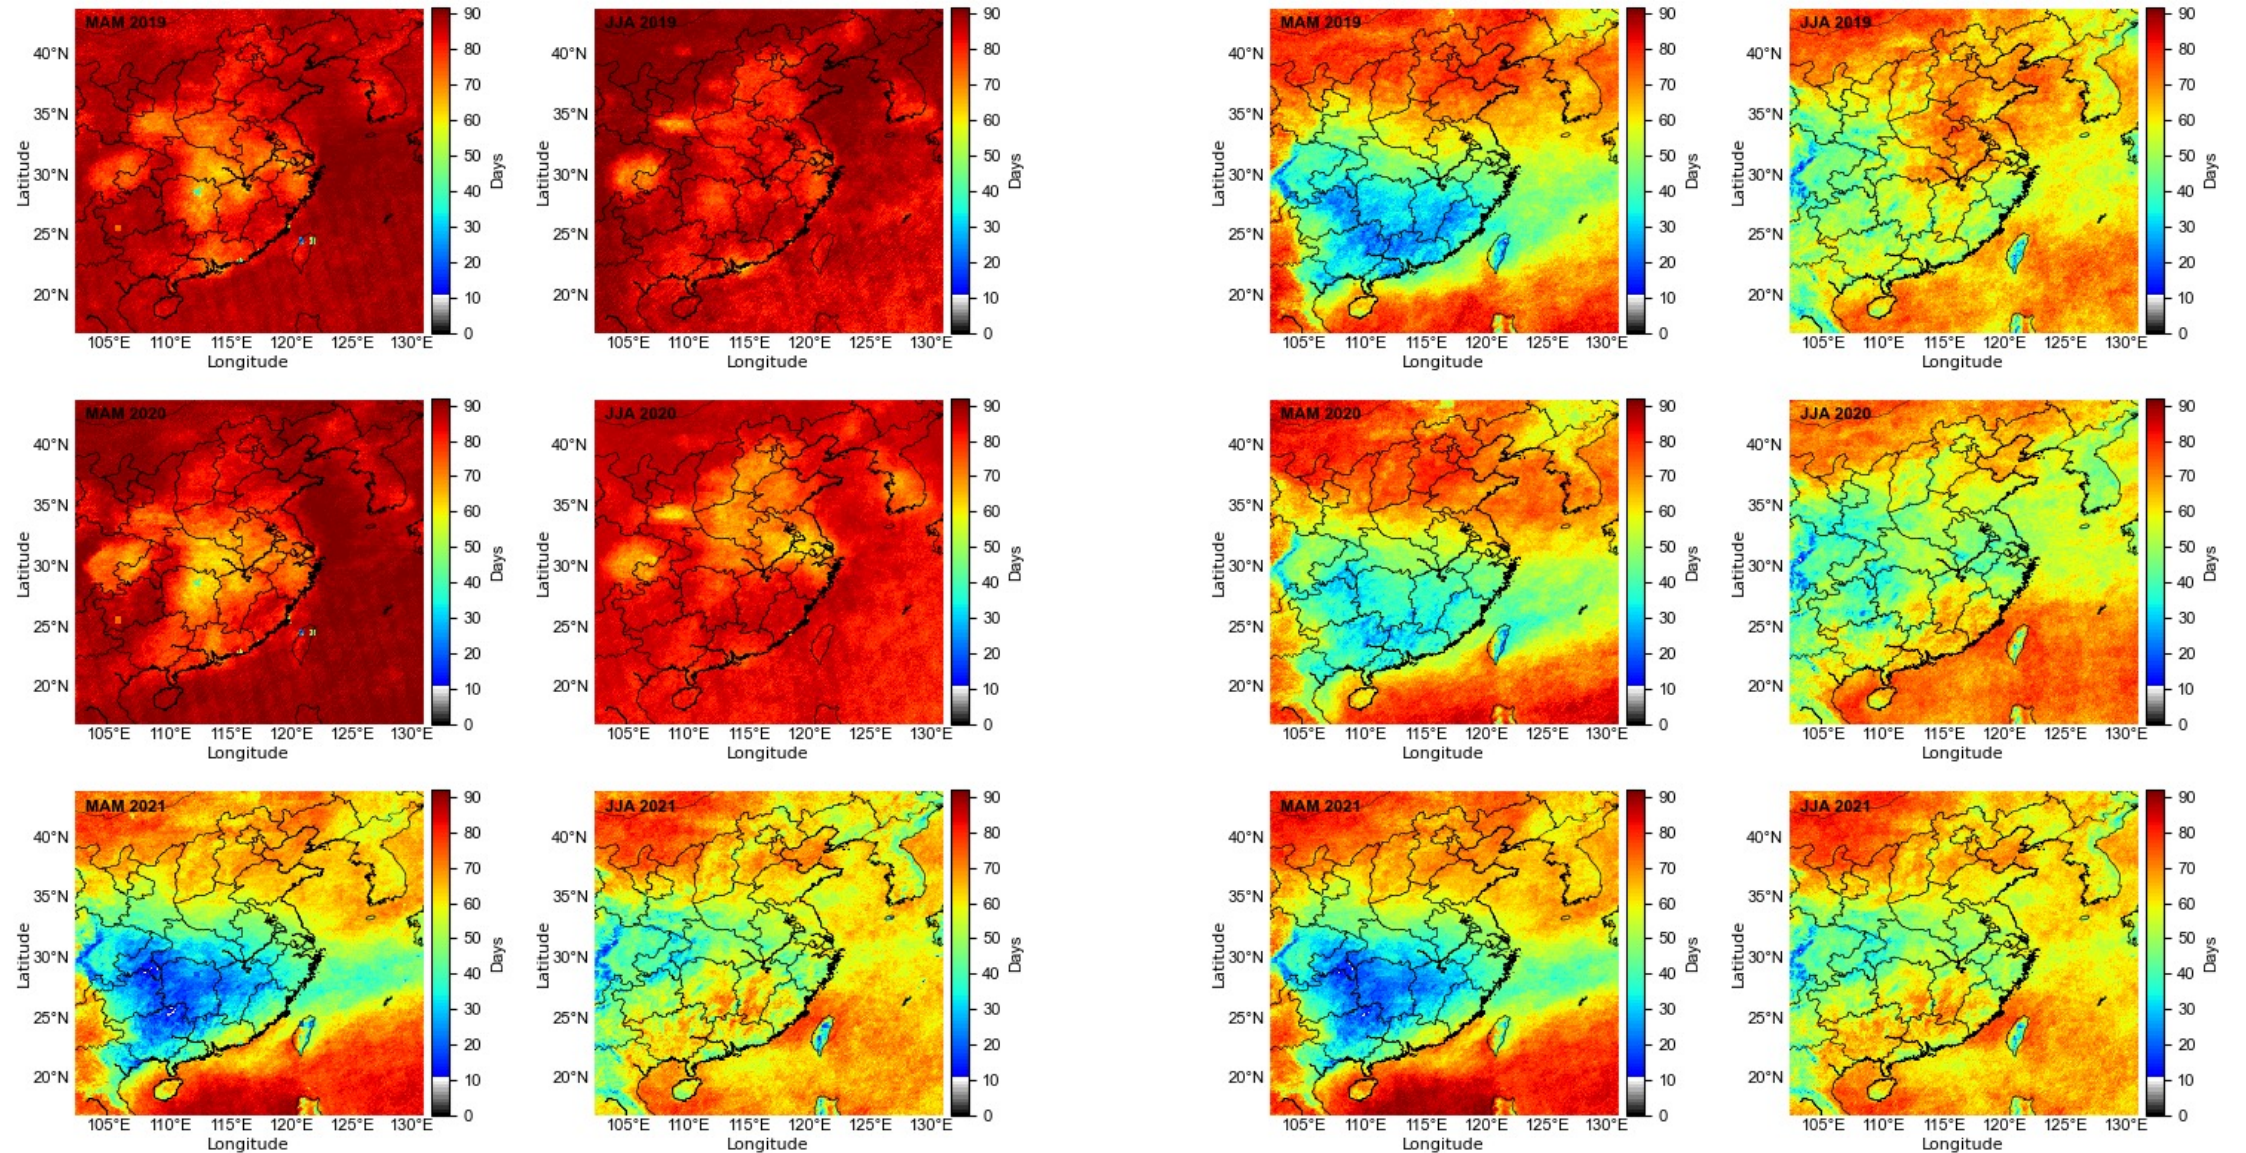

Figure S3. The number of days with available satellite data after filtering: (Left) KNMI tropospheric NO<sub>2</sub> columns, (Right) NASA data. The data with quality assurance > 0.50 and cloud radiance fraction < 0.4 are selected for analysis.

# Absolute Values

## KNMI product w/ new filter

## NASA product w/ new filter

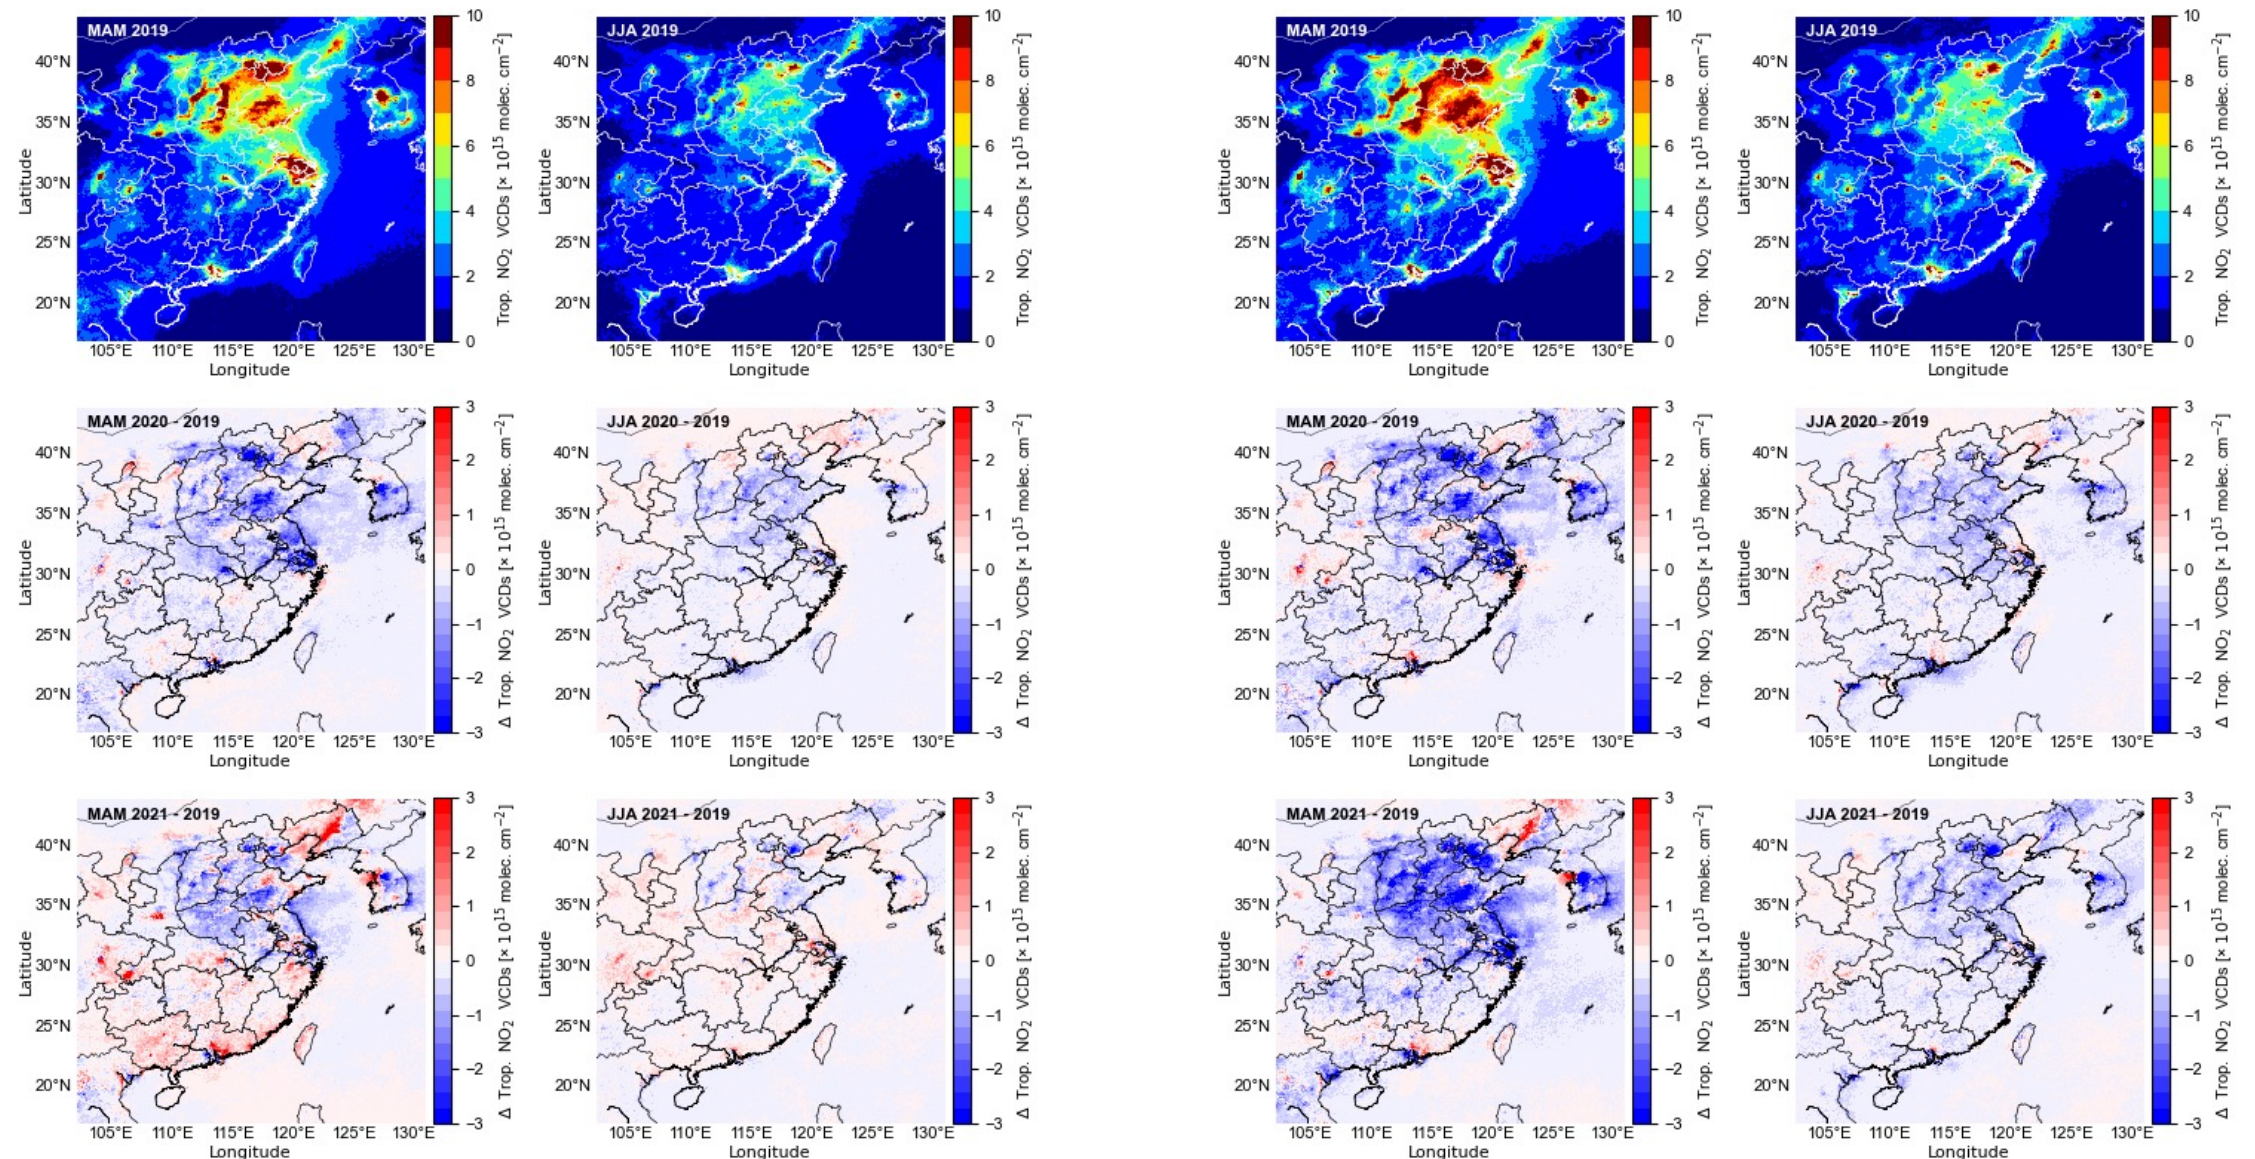

Figure S4. (Left) KNMI tropospheric NO<sub>2</sub> columns in 2019 and differences between 2020 and 2019 or 2021 and 2019, (Right) NASA data. The data with quality assurance > 0.75 and cloud radiance fraction < 0.5 are selected for analysis.

# Absolute Values

## KNMI product w/ new filter

## NASA product w/ new filter

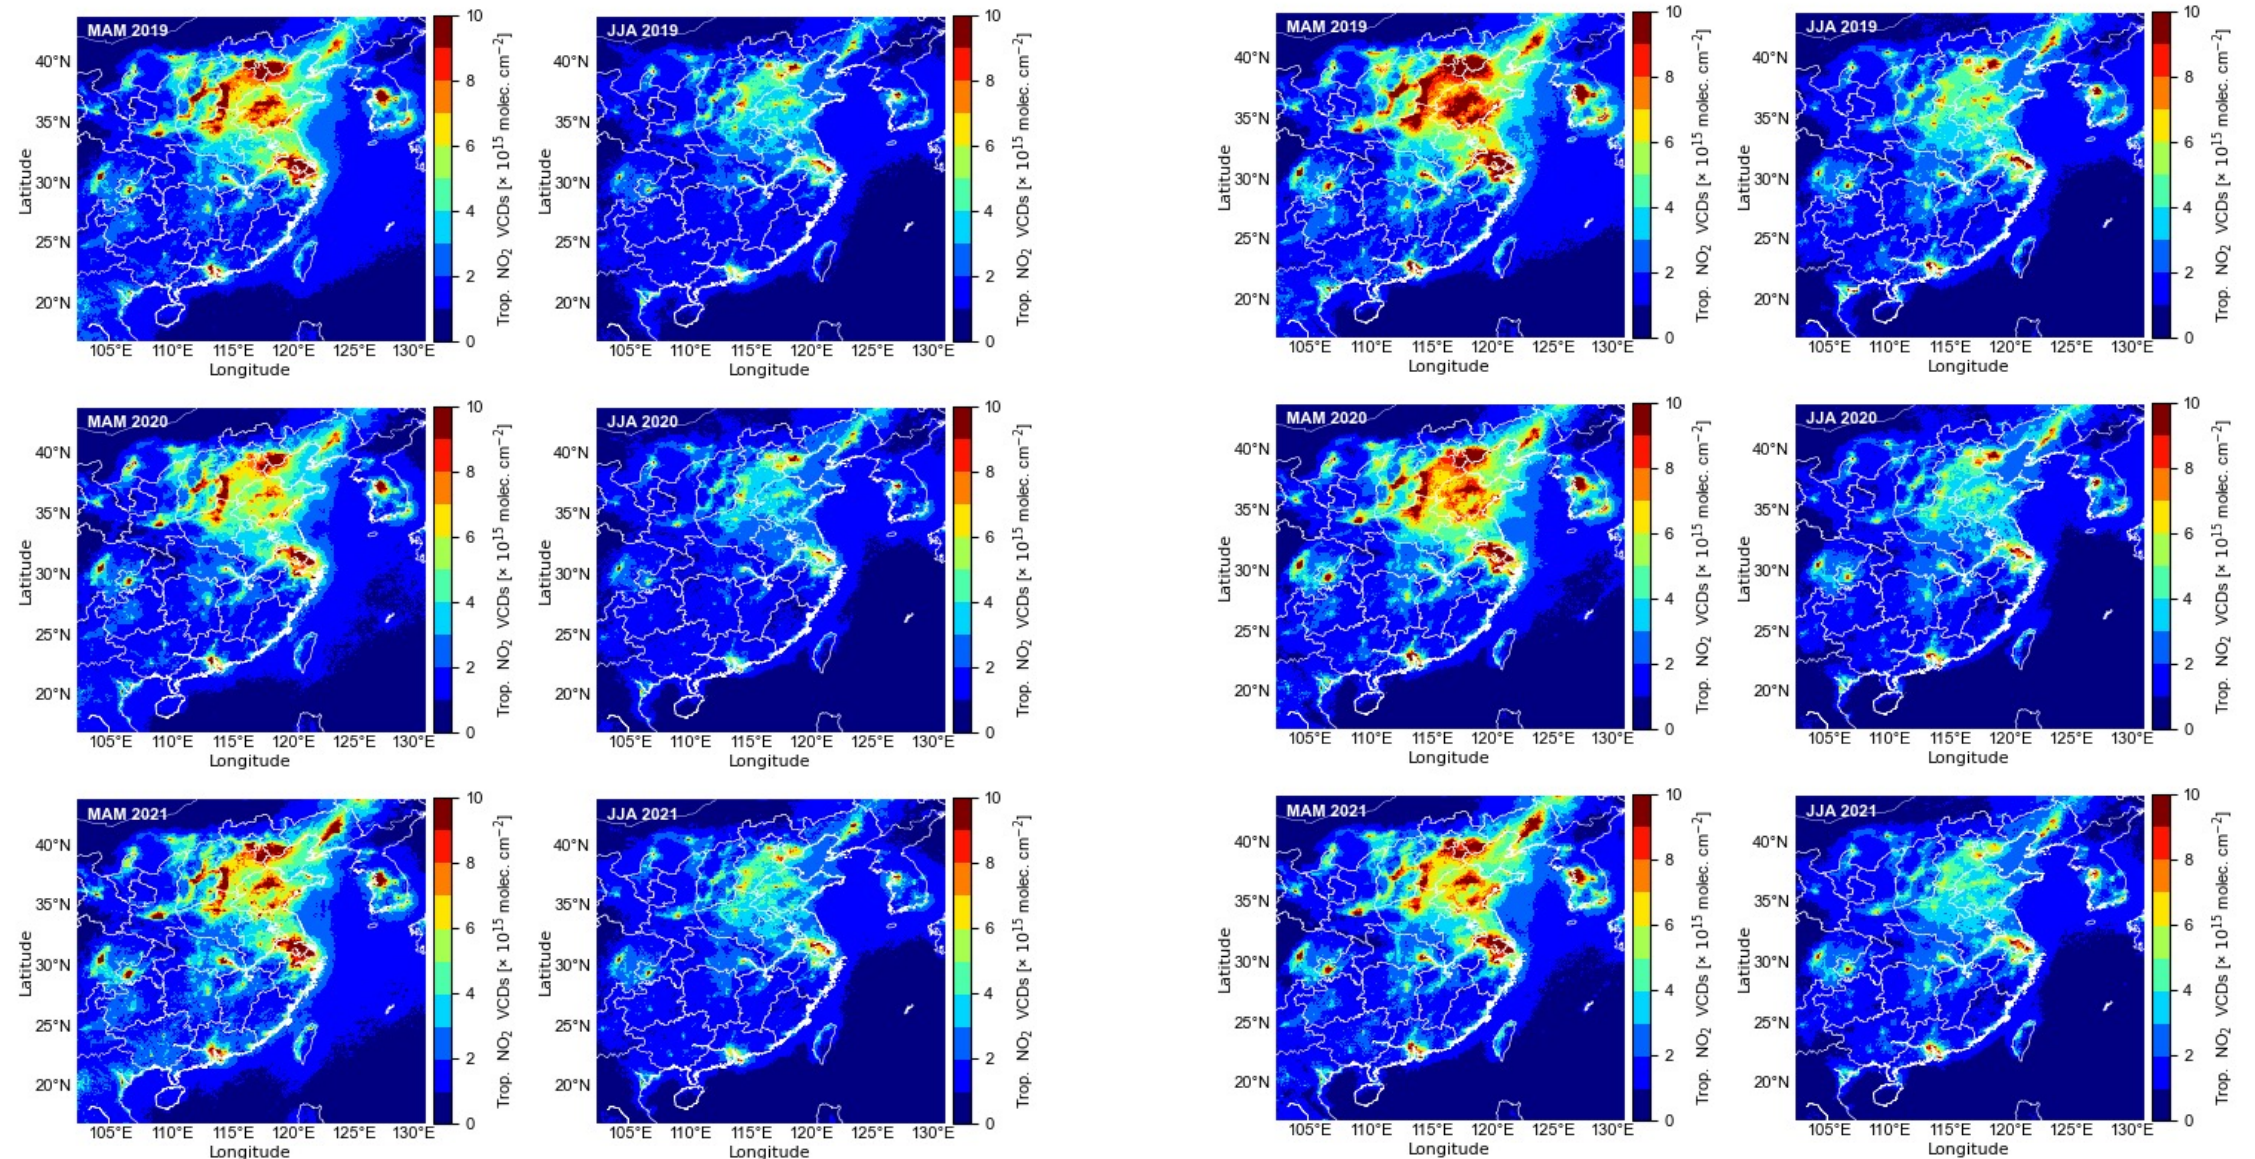

Figure S5. (Left) KNMI tropospheric NO<sub>2</sub> columns in 2019, 2020 and 2021, (Right) NASA data. The data with quality assurance > 0.75 and cloud radiance fraction < 0.5 are selected for analysis.

Days available from  
daily product KNMI product w/ new filter

NASA product w/ new filter

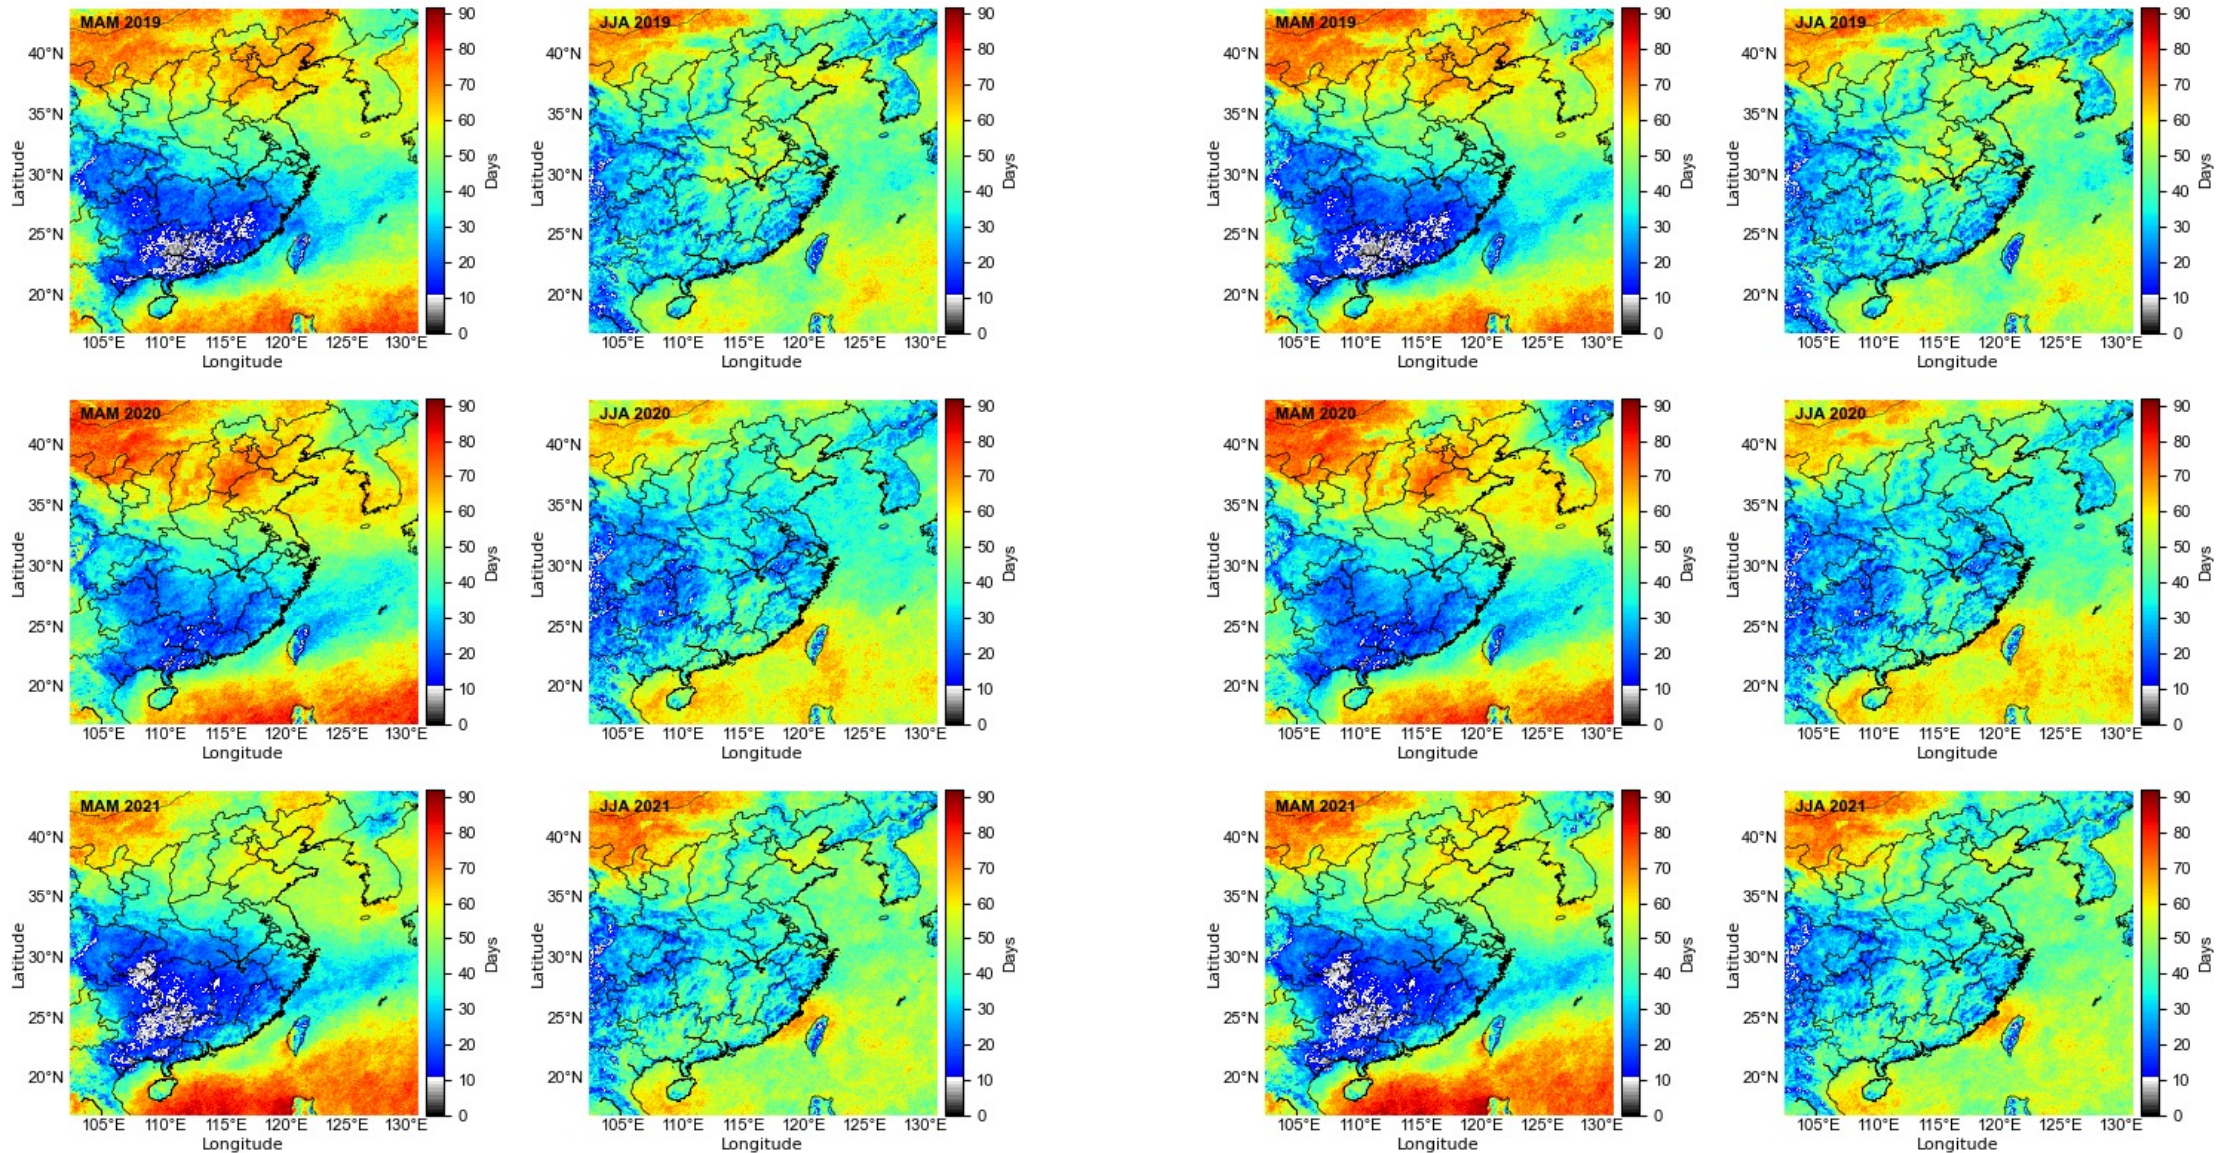

Figure S6. The number of days with available satellite data after filtering: (Left) KNMI tropospheric NO<sub>2</sub> columns, (Right) NASA data. The data with quality assurance > 0.75 and cloud radiance fraction < 0.5 are selected for analysis.
